# Supplementary material for: 3(5)-(1-Adamantyl)pyrazoles: chemistry and molecular structure †
Source: Royal Society of Chemistry journal article supplement (doi:10.1039/b004690f), 2000-01-01
Supplement: b004690f.doc [file b004690f.doc]

# Supplementary data

**3(5)-(1-Adamantyl)pyrazoles: chemistry and molecular structure**

**Rosa María Claramunt,**a* Concepción López,**a* María de los Angeles García,*a* Marcel Pierrot,**b* Michel Giorgi*b* and José Elguero*c***

*a Departamento de Química Orgánica y Biología, Facultad de Ciencias, UNED, Senda del Rey 9, E-28040 Madrid, Spain*

*b Laboratoire de Bioinorganique Structurale, Faculté des Sciences de Saint Jérôme, F-13397 Marseille Cédex 20, France*

*c Centro de Química Orgánica 'Manuel Lora Tamayo', CSIC, Juan de la Cierva 3, E-28006 Madrid, Spain*

**Detailed experimental procedures and structural analysis for 1–3**

**3(5)-(1-Adamantyl)pyrazole 1**

(1-Adamantyl)methyl ketone (7.84, 0.044 mol) and ethyl formate (4.88 g, 0.066 mol) were added, in one portion, with rapid stirring to dry sodium ethoxide (2.98 g, 0.044 mol) in 100 mL of toluene, in a round-bottomed flask of 250 mL provided with a refrigerant and mechanical stirrer. The mixture is stirred during 8 h. The solid obtained was filtered and washed with hot hexane, air dried and then slurred in 200 mL of ethanol. To this ethanol slurry, hydrazine monohydrochloride (3 g, 0.044 mol) and 50 mL of water were added. After 2 hours of stirring, the ethanol was removed under reduced pressure. The remaining aqueous solution was extracted three times with dichloromethane (3 x 50 mL). The solution was dried over anhydrous sodium sulfate and the dichloromethane removed under reduced pressure. The residue was purified by column chromatography [silica gel, eluent: dichloromethane-hexane (1:1)]. *R*f (dichloromethane-ethanol 9:1) = 0.56. 3(5)-(1-adamantyl)pyrazole **1** was obtained in 3.7 g yield (isolated product) (42%) as a white solid with a melting point of 146.0 °C by differential scanning calorimetry (DSC). Lit. m.p. 135-138 °C.4 EM (*m/z*, %):203 (16), 202 (100) [M+.], 159 (11), 146 (12), 145 (78), 109 (13), 91 (12), 81 (15), 79 (20), 77 (15), 41 (24), 39 (23), 32 (17), 28 (48). IR (KBr, cm-1): 3180, 3060, 2930, 2860, 1740, 1570, 1530, 1450, 1370, 1350, 1325, 1320, 1950, 1220, 1180, 1110, 1100, 1080, 1040, 990, 970, 930, 900, 810, 770, 720, 680, 620. 1H NMR (DMSO-d6): = 12.39 (br s, 1H, N-H), 7.38 (br s, 1H, H-3), 5.98 (br s, 1H, H-4), 1.99 (m, 3H, H-Ad), 1.85 (d, 6H, 3*J* = 2.8, H-Ad), 1.71 (cm, 6H, H-Ad). 1H NMR (CDCl3): = 7.50 (d, 1H, H-3, 3*J* = 1.9 Hz), 6.09 (d, 1H, H-4, 3*J* = 1.9 Hz), 2.07 (m, 3H, H-Ad), 1.95 (d, 6H, 3*J* = 2.8, H-Ad, 3*J* = 2.8 Hz), 1.78 (m, 6H, H-Ad). 13C NMR (CDCl3)= 156.3 (s, C-Ad), 135.9 (d, 1*J* = 184.9 Hz, CH), 100.5 (dd, 1*J* = 174.0, 2*J* = 9.9 Hz, C-4), 42.6 (t, 1*J* = 128.2 Hz, C-Ad), 36.7 (t, 1*J* = 126.6 Hz, C-Ad), 33.1 (cm, C-Ad), 28.2 (d, 1*J*= 132.3 Hz, C-Ad). Anal.Calcd. for C13H18N2: C, 77.18; H, 8.97; N, 13.85; Found: C, 77.10; H, 9.01; N, 13.31.

**3(5)-(1-Adamantyl)-4-bromopyrazole 2**

To a solution of 0.3 g (0.0015 mol) of 3(5)-(1-adamantyl)pyrazole (1) in 5 mL of chloroform, 0.1 mL of bromine (0.002 mol) in 1 mL of chloroform was slowly added and the mixture was heated under reflux for 2 hours. After cooling, the reaction mixture was treated with a saturated solution of sodium bicarbonate and extracted with chloroform. The organic layer was dried over anhydrous sodium sulfate and the solvent removed under vacuum. The solid was recrystallized from chloroform/hexane. 3(5)-(1-Adamantyl)-4-bromopyrazole (**2**, 0.41 g of isolated product) was obtained in 98% yield as a white solid with a melting point of 198.5 °C by differential scanning calorimetry (DSC). EM (*m/z*, %): 283 (16), 282 (97) [M+., 81Br], 281 (18), 280 (100) [M+., 79Br], 226 (12), 225 (47), 224 (16), 223 (51), 201 (20), 161 (10), 159 (18), 145 (22), 144 (69), 119 (14), 118 (13), 94 (31), 93 (18), 92 (10), 91 (24), 81 (14), 80 (12), 79 (49), 78 (13), 77 (35), 67 (16), 65 (20), 55 (13), 53 (19), 51 (14), 41 (57), 39 (48), 29 (22). IR (KBr, cm-1): 3150, 3070, 2940, 2860, 1550, 1450, 1410, 1370, 1350, 1330, 1320, 1290, 1250, 1190, 1130, 1110, 1010, 980, 950, 860, 700, 650. 1H NMR (CDCl3)  = 10.41 (s, 1H, N-H), 7.47 (s, 1H, H-3), 2.11 (s, 9H, H y H-Ad), 1.78 (s, 6H, H-Ad). 13C NMR (CDCl3) = 148.7 (br s, C-5), 139.9 (d, 1*J* = 193.2 Hz, C-3), 89.9 (d, 2*J*= 7.7 Hz, C-4), 39.7 (t, 1*J* = 128.0 Hz, C-Ad), 36.5 (t, 1*J* = 126.6 Hz, C-Ad), 34.3 (q, C-Ad), 28.2 (d, 1J= 132.8 Hz, C-Ad). 13C NMR CPMAS: = 147.7 (C-5), 140.5 (C-3), C-4 not observed, 40.2 (C-Ad), 36.5 (C-Ad), 34.3 (C-Ad), 28.7 (C-Ad).Anal. Calcd. for C13H17BrN2: C, 55.53; H, 6.09; N, 9.96; Found: C, 55,06; H, 6.01; N, 9.79.

**3(5)-(1-Adamantyl-3-hydroxy)-4-nitropyrazol**e **3**

A mixture of 0.1 mL of nitric acid (d = 1,52) and 1 mL of sulfuric acid (d = 1,84) was added carefully and with external cooling to a solution of 0.3 g (0.0015 mol) of 3(5)-(1-adamantyl)pyrazole (**1**) in 1 mL of sulfuric acid. The reaction was stirred overnight at room temperature and then poured over crushed ice. The precipitated was filtered, washed with water, dried and crystallized in ethanol/water. 3(5)-(1-adamantyl-3-hydroxy)-4-nitropyrazole (**3**) was obtained in 0.29 g yield (75 %) as a white solid with a melting point of 210.0 °C by differential scanning calorimetry (DSC). The compound crystallizes with a 1/2 H2O. EM (m/z, %): 263 (3) [M+.], 247 (17), 246 (100), 245 (62), 229 (20), 228 (92), 218 (26), 217 (12), 206 (79), 202 (12), 201 (14), 200 (48), 192 (18),190 (17), 189 (35), 188 (20), 187 (13), 186 (32), 184 (12), 176 (48),175 (16), 174 (50), 173 (26), 172 (26), 171 (12), 170 (20), 162 (17), 161 (22), 160 (80), 159 (30), 158 (42), 157 (12), 150 (15), 149 (15), 148 (24), 147 (29), 146 (38), 145 (21), 144 (12), 136 (23), 135 (17), 134 (36), 133 (34), 132 (33), 131 (24), 130 (11), 124 (21), 123 (19), 122 (19), 121 (19), 120 (50), 119 (26), 118 (20), 117 (14), 116 (11), 115 (13), 110 (13),109 (21), 108 (21), 107 (29), 106 (16), 105 (24), 104 (20), 103 (10), 96 (25), 95 (78), 94 (17), 93 (33), 92 (18), 91 (39), 82 (11), 81 (32), 80 (17), 79 (37), 78 (18), 77 (49), 69 (19), 68 (17), 67 (31), 66 (16), 65 (28), 63 (11), 57 (16), 56 (11), 55 (48), 54 (14), 53 (32), 52 (14). IR (KBr, cm-1): 3400, 2940, 2860, 1570, 1510, 1480, 1430, 1390, 1360, 1320, 1240, 1200, 1170, 1120, 1110, 1080, 990, 960, 950, 940, 880, 850, 820, 760. 1H NMR (DMSO-d6): = 13.45 (br s, 1H, N-H), 8.51 (br s, 1H, H-3), 4.53 (s, 1H, OH), 2.18 (s, 2H), 1.91 (s, 6H), 1.64-1.51 (m, 6H). 13C NMR (DMSO-d6):  150.6 (br s, C-5), 136.2 (br d, 1*J* = 173.3 Hz, C-3), 132.6 (d, 2*J* = 6.1 Hz, C-4), 66.3 (s, C3'), 46.3 (t, 1*J* = 127.6 Hz, C2'), 44.2 (t, 1*J* = 127.3 Hz, C4' y C10'), 38.0 (s, C1'), 37.5 (t, 1*J* = 136.4 Hz, C8' y C9'), 34.8 (t, 1*J* = 130.4 Hz, C6'), 29.8 (d, 1*J* =132.9 Hz, C5' y C7'). Anal. Calcd. for C13H17N3O3.1/2 H2O: C, 57.34; H, 6.66; N, 15.43; Found: C, 57.53; H, 6.68, N, 15.35.
